# Supplementary material for: Improving the Discriminability of Haptic Icons: The Haptic Tuning Fork
Source: MDPI journal article supplement (doi:10.3390/app11188772), 2021-09-21
Supplement: s1 [file s1]

## Article

# SUPPLEMENTARY MATERIAL

## Improving the discriminability of haptic icons: The Haptic Tuning Fork.

Laura Raya<sup>1</sup> , Sara A. Boga<sup>2</sup> , Marcos Garcia-Lorenzo<sup>3,†,\*</sup>  and Sofia Bayona<sup>3,†</sup> 

<sup>1</sup> Centro Universitario de Tecnología y Arte Digital, Madrid, Spain

<sup>2</sup> The SPA Studios, Madrid, Spain

<sup>3</sup> Universidad Rey Juan Carlos, Móstoles, Madrid, Spain

\* Correspondence: marcos.garcia@urjc.es; Tel.: +34-91-488-4625)

† Center for Computation and Simulation, UPM, Spain

‡ These authors contributed equally to this work.

### 1. Summary of experiments

Table S1: This table provides all the details regarding the performed experiments.

|              | Experiment A                                                                                                                               | Experiment B                                                                                           | Experiment C                                                                                                                    |
|--------------|--------------------------------------------------------------------------------------------------------------------------------------------|--------------------------------------------------------------------------------------------------------|---------------------------------------------------------------------------------------------------------------------------------|
| Aim of study | Number of hits with/without the haptic tuning fork.                                                                                        | Number of hits with/without the haptic tuning fork.                                                    | Number of hits with/without the haptic tuning fork in an environment with divided attention (different sources of information). |
| Haptic icons | Sinusoidal shape. Each note has a different frequency. Scales: 3-note frequency scale, 5-note frequency scale, and 7-note frequency scale. | Sinusoidal, sawtooth and square shape. Three 5-note frequency-based haptic scales, one for each shape. | Sinusoidal shape. Each note has a different frequency. 7-note frequency-based scale.                                            |

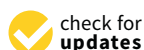

**Citation:** Raya, L.; Boga, S. A. ; Garcia-Lorenzo, M.; Bayona, S. Improving Data Visualization with Haptic Technology: The Haptic Tuning Fork. *Appl. Sci.* **2021**, *11*, 8772. <https://doi.org/10.3390/app11188772>

Received: 2 August 2021

Accepted: 16 September 2021

Published: 21 September 2021

**Publisher's Note:** MDPI stays neutral with regard to jurisdictional claims in published maps and institutional affiliations.

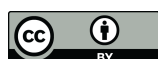

**Copyright:** © 2021 by the authors. Licensee MDPI, Basel, Switzerland. This article is an open access article distributed under the terms and conditions of the Creative Commons Attribution (CC BY) license (<https://creativecommons.org/licenses/by/4.0/>).

|                            | Experiment A                                                                                                                                                                                                                                                | Experiment B                                                                                                                                                                                                                                                                                                                      | Experiment C                                                                                                                                                                                                                                                                                                                                                     |
|----------------------------|-------------------------------------------------------------------------------------------------------------------------------------------------------------------------------------------------------------------------------------------------------------|-----------------------------------------------------------------------------------------------------------------------------------------------------------------------------------------------------------------------------------------------------------------------------------------------------------------------------------|------------------------------------------------------------------------------------------------------------------------------------------------------------------------------------------------------------------------------------------------------------------------------------------------------------------------------------------------------------------|
| Experiment design and task | <p>Two factor within-subject (repeated measure) design.</p> <p>Task: Presenting notes from a scale of 3 (then 5, then 7) notes with and without the haptic tuning fork. The order of using or not the haptic tuning fork was balanced between subjects.</p> | <p>Two factor within-subject (repeated measure) design.</p> <p>Task: Presenting notes from 5-note frequency-based scales of the shapes sinusoidal, sawtooth and square (randomly), with/without the haptic tuning fork.</p> <p>The order of using or not the haptic tuning fork was balanced between subjects.</p>                | <p>Two factor within-subject (repeated measure) design.</p> <p>Task: Users perform a task of selective attention. Users watch a video where they must pay attention. Simultaneously, notes are presented from a scale of 7 notes with/without the haptic tuning fork.</p> <p>The order of using or not the haptic tuning fork was balanced between subjects.</p> |
| Familiarization            | <p>For each scale, its different haptic notes are presented and named simultaneously, i.e. for the 7 note frequency scale: “Note 1”, then “Note 2”, etc.</p>                                                                                                | <p>For each shape scale, its different haptic notes are presented and named simultaneously, i.e. “Scale sinusoidal shape. Note 1”, then “Scale sinusoidal shape. Note 2”, etc.</p>                                                                                                                                                | N/A                                                                                                                                                                                                                                                                                                                                                              |
| Training                   | <p>For each scale, random notes are displayed. Users say which note they think it is and receive a sound indicating if they are right. If wrong, they are told which was that particular note. Number of stimuli: 2*number of notes in each scale.</p>      | <p>Random notes are displayed. Users say which note (shape and frequency) they think it is and receive a sound indicating if they are right. If wrong, they are told which was the shape of the scale and the particular note, i.e. “Scale sawtooth. Note 3”.</p> <p>Number of stimuli: 5 frequency notes*3 different shapes.</p> | N/A                                                                                                                                                                                                                                                                                                                                                              |

|           | Experiment A                                                                                                                                                                                                                                                                                                                                                                                                                                                                                                                                                                                                                                              | Experiment B                                                                                                                                                                                                                                                                                                                                                                                                                                                                                                                                | Experiment C                                                                                                                                                                                                                                                                                                                                                                                                                                                                                                                |
|-----------|-----------------------------------------------------------------------------------------------------------------------------------------------------------------------------------------------------------------------------------------------------------------------------------------------------------------------------------------------------------------------------------------------------------------------------------------------------------------------------------------------------------------------------------------------------------------------------------------------------------------------------------------------------------|---------------------------------------------------------------------------------------------------------------------------------------------------------------------------------------------------------------------------------------------------------------------------------------------------------------------------------------------------------------------------------------------------------------------------------------------------------------------------------------------------------------------------------------------|-----------------------------------------------------------------------------------------------------------------------------------------------------------------------------------------------------------------------------------------------------------------------------------------------------------------------------------------------------------------------------------------------------------------------------------------------------------------------------------------------------------------------------|
| Procedure | <p>The same as the training but with no feedback (no sound and no indication of the name of the note in case of failure).</p> <p>Number of stimuli: 3*number of notes in each scale: 3*3, 3*5, 3*7.</p> <p>Experiment repeated twice, with and without the haptic tuning fork, balancing the order.</p> <p>Independent variable:<br/>- with/without haptic tuning fork</p> <p>Dependent variables:<br/>- number of hits,<br/>- accumulated distance error between the note indicated by the user and the correct note,<br/>- subjective willingness of use the haptic tuning fork<br/>- subjective improved level of confidence</p> <p>Population: 11</p> | <p>The same as the training but with no feedback (no sound and no indication of the name of the note in case of failure).</p> <p>Number of stimuli: 3 shapes (sine wave, sawtooth wave and square wave) * 5 notes in each scale.</p> <p>Experiment repeated twice, with and without the haptic tuning fork, balancing the order.</p> <p>Independent variable:<br/>- with/without haptic tuning fork.</p> <p>Dependent variables:<br/>- number of hits,<br/>- subjective willingness of use the haptic tuning fork</p> <p>Population: 11</p> | <p>A video is projected to the subjects. They must pay attention, as they will have to answer a question at the end of the video. Music is played at the same time, also to divide the attention.</p> <p>Number of stimuli: 10 random notes from the 7-note frequency-based scale.</p> <p>Experiment repeated twice, with/without the haptic tuning fork, balancing the order.</p> <p>Independent variable:<br/>with/without haptic tuning fork.</p> <p>Dependent variables:<br/>- number of hits</p> <p>Population: 11</p> |
| Analysis  | Kolmogorov-Smirnov and t-Test for paired samples studying the use of the haptic tuning fork.                                                                                                                                                                                                                                                                                                                                                                                                                                                                                                                                                              | Kolmogorov-Smirnov and t-Test for paired samples studying the use of the haptic tuning fork.                                                                                                                                                                                                                                                                                                                                                                                                                                                | Kolmogorov-Smirnov and t-Test for paired samples studying the use of the haptic tuning fork.                                                                                                                                                                                                                                                                                                                                                                                                                                |

|                   | Experiment A                                                                                                                                                                                                                                                                                                                                                                                                                                                                                                                                                                                                                                                                                                                                                                                                                                    | Experiment B                                                                                                                                                                                                                                                                                                                                                                                             | Experiment C                                                                                          |
|-------------------|-------------------------------------------------------------------------------------------------------------------------------------------------------------------------------------------------------------------------------------------------------------------------------------------------------------------------------------------------------------------------------------------------------------------------------------------------------------------------------------------------------------------------------------------------------------------------------------------------------------------------------------------------------------------------------------------------------------------------------------------------------------------------------------------------------------------------------------------------|----------------------------------------------------------------------------------------------------------------------------------------------------------------------------------------------------------------------------------------------------------------------------------------------------------------------------------------------------------------------------------------------------------|-------------------------------------------------------------------------------------------------------|
| Objective results | <p><b>3-note scale.</b><br/>No statistical differences.<br/>Hit rate close to 100% with and without the haptic tuning fork.<br/>Accumulated error close to zero.</p> <p><b>5-note scale.</b><br/>Hit-rate mean difference: 10.3% (p-value &lt; 0.05) favouring the use of the haptic tuning fork.</p> <p>Accumulated error mean difference: -1.55 (p-value &lt; 0.05), less error with the haptic tuning fork.</p> <p><b>7-note scale.</b><br/>Hit-rate mean difference: 22.08% (p-value &lt; 0.001) favouring the use of the haptic tuning fork.</p> <p>Accumulated error mean difference: -4.73 (p-value &lt; 0.001), less error with the haptic tuning fork.</p> <p>As the number of notes in the scale increases, the hit rate decreases more rapidly and the accumulated error increases faster when not using the haptic tuning fork.</p> | <p><b>Identifying frequencies and shapes.</b><br/>Hit-rate mean difference: 20% (p-value &lt; 0.05) favouring the use of the haptic tuning fork.</p> <p><b>Identifying frequencies.</b><br/>Hit-rate mean difference: 14.55% (p-value &lt; 0.001) favouring the use of the haptic tuning fork.</p> <p><b>Identifying shapes.</b><br/>No statistical differences with/without the haptic tuning fork.</p> | <p>Hit-rate mean difference: 25% (p-value &lt; 0.05) favouring the use of the haptic tuning fork.</p> |

|                    | Experiment A                                                                                                                                                                                                                                                                                                                                                                                                                                                                                                                                                                                                                                                                                                                                                                                                                                            | Experiment B                                                                                      | Experiment C |
|--------------------|---------------------------------------------------------------------------------------------------------------------------------------------------------------------------------------------------------------------------------------------------------------------------------------------------------------------------------------------------------------------------------------------------------------------------------------------------------------------------------------------------------------------------------------------------------------------------------------------------------------------------------------------------------------------------------------------------------------------------------------------------------------------------------------------------------------------------------------------------------|---------------------------------------------------------------------------------------------------|--------------|
| Subjective results | <p>All subjects affirmed that, if they had to perform data analysis using the haptic channel, they would prefer to count with a haptic tuning fork.</p> <p>5-point Likert scale about the increase on the level of confidence when using the haptic tuning fork: 27.3% indicated that the haptic tuning fork extremely increased their confidence level, by answering 5; 63.6% answered 4 ("Very"); and 9.1% answered 3 ("Moderately").</p> <p>Subjects reported that the haptic tuning fork was "Slightly" useful (median and mode "Slightly") for the 3-note scale; most of the subjects reported that it was "Very" or "Extremely" useful (median "Very", mode "Extremely") for the 5-note scale;; whereas for the 7-note scale, most of the subjects reported that the haptic tuning fork was "Extremely" useful (median and mode "Extremely").</p> | All subjects indicated that they preferred to perform the exploration task using the tuning fork. | N/A          |

## 2. Transmitted Information

We have computed the faithfully transmitted information for all scenarios tested in experiment A: 3, 5, and 7 haptic note scales with and without the haptic tuning fork. Table S2 shows the transmitted information entropy, and it was computed as  $H_T = H_S + H_R - H_{SR}$ , where  $H_S$  is the entropy of the sent information,  $H_R$  is the entropy of the user response, and  $H_{SR}$  is the stimulus-response entropy.  $H_S$  fixes an upper limit for  $H_T$  and, since all the haptic icons are equally probable, is maximized for 3, 5 and 7 different stimuli. Table S3 shows the  $H_S$  values. Table S4 and Table S5 show  $H_R$  and  $H_{SR}$  values respectively.

Table S2: Entropy of the faithfully transmitted information ( $H_T$ )

| Number of<br>different<br>stimuli | $H_T$                  |                     |
|-----------------------------------|------------------------|---------------------|
|                                   | Without<br>tuning fork | With<br>tuning fork |
| 3                                 | 1,43002789             | 1,52730064          |
| 5                                 | 1,54124731             | 1,7121755           |
| 7                                 | 1,5211022              | 1,96162032          |

Table S3: Sent information entropy ( $H_S$ )

| Number of<br>different<br>stimuli | $H_S$               |
|-----------------------------------|---------------------|
| 3                                 | $\log_2(3) = 1,585$ |
| 5                                 | $\log_2(5) = 2,322$ |
| 7                                 | $\log_2(7) = 2,807$ |

Table S4: User response entropy ( $H_R$ )

| Number of<br>different<br>stimuli | $H_R$                  |                     |
|-----------------------------------|------------------------|---------------------|
|                                   | Without<br>tuning fork | With<br>tuning fork |
| 3                                 | 1,58464629             | 1,58464629          |
| 5                                 | 2,31610085             | 2,32080849          |
| 7                                 | 2,79627244             | 2,79814493          |

Table S5: Stimulus-response entropy ( $H_{SR}$ )

| Number of<br>different<br>stimuli | $H_{SR}$               |                     |
|-----------------------------------|------------------------|---------------------|
|                                   | Without<br>tuning fork | With<br>tuning fork |
| 3                                 | 1,7395809              | 1,64230815          |
| 5                                 | 3,09678164             | 2,93056109          |
| 7                                 | 4,08252516             | 3,64387954          |
